# Supplementary material
Source: publisher figshare collection journal article supplement (https://sage.figshare.com/ndownloader/files/14670770)
Supplement: Supplementary file 1 [file 14670770]

| Description                                                                | ICD-9 &/or CPT code                                            |
|----------------------------------------------------------------------------|----------------------------------------------------------------|
| Osteoarthritis of the Hand                                                 | ICD-9-D-715.04, ICD-9-D-715.14, ICD-9-D-715.34, ICD-9-D-715.94 |
| Arthroplasty of interphalangeal joint; with prosthetic implant, each joint | CPT-26536                                                      |
| Removal of implant from finger or hand                                     | CPT-26320                                                      |

Supplementary Table 1. List of ICD-9 and CPT codes used for study. ICD-9 = International Classification of Disease, ninth revision; CPT = Current Procedural Terminology
